# Supplementary material for: Structure and Microbiological Activity of 1H-benzo[d]imidazole Derivatives
Source: MDPI journal article supplement (doi:10.3390/ijms24043319), 2023-02-07
Supplement: s1 [file s1]

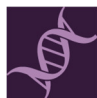

SUPPLEMENTARY MATERIALS

# Structure and Microbiological Activity of 1*H*-benzo[*d*]imidazole Derivatives

Andrzej Olczak <sup>1</sup>, Tomasz Pawlak <sup>2,\*</sup>, Sylwia Kałużyńska <sup>1</sup>, Katarzyna Gobis <sup>3</sup>, Izabela Korona-Głowniak <sup>4</sup>,  
Katarzyna Suśniak <sup>4</sup>, Marcin Zaborowski <sup>5</sup> and Małgorzata Szczesio <sup>1</sup>

<sup>1</sup> Institute of General and Ecological Chemistry, Faculty of Chemistry, Lodz University of Technology, Zeromskiego 116, 90-924 Lodz, Poland

<sup>2</sup> Centre of Molecular and Macromolecular Studies, Polish Academy of Science, Sienkiewicza 112, 90-363 Lodz, Poland

<sup>3</sup> Department of Organic Chemistry, Faculty of Pharmacy, Medical University of Gdańsk, Gen. Hallera Ave. 107, 80-416 Gdańsk, Poland

<sup>4</sup> Department of Pharmaceutical Microbiology, Faculty of Pharmacy, Medical University of Lublin, Chodźki Street 1, 20-093 Lublin, Poland

<sup>5</sup> Dean Office's, Faculty of Chemistry, Lodz University of Technology, Zeromskiego 114, 90-543 Lodz, Poland

\* Correspondence: tpawlak@cbmm.lodz.pl

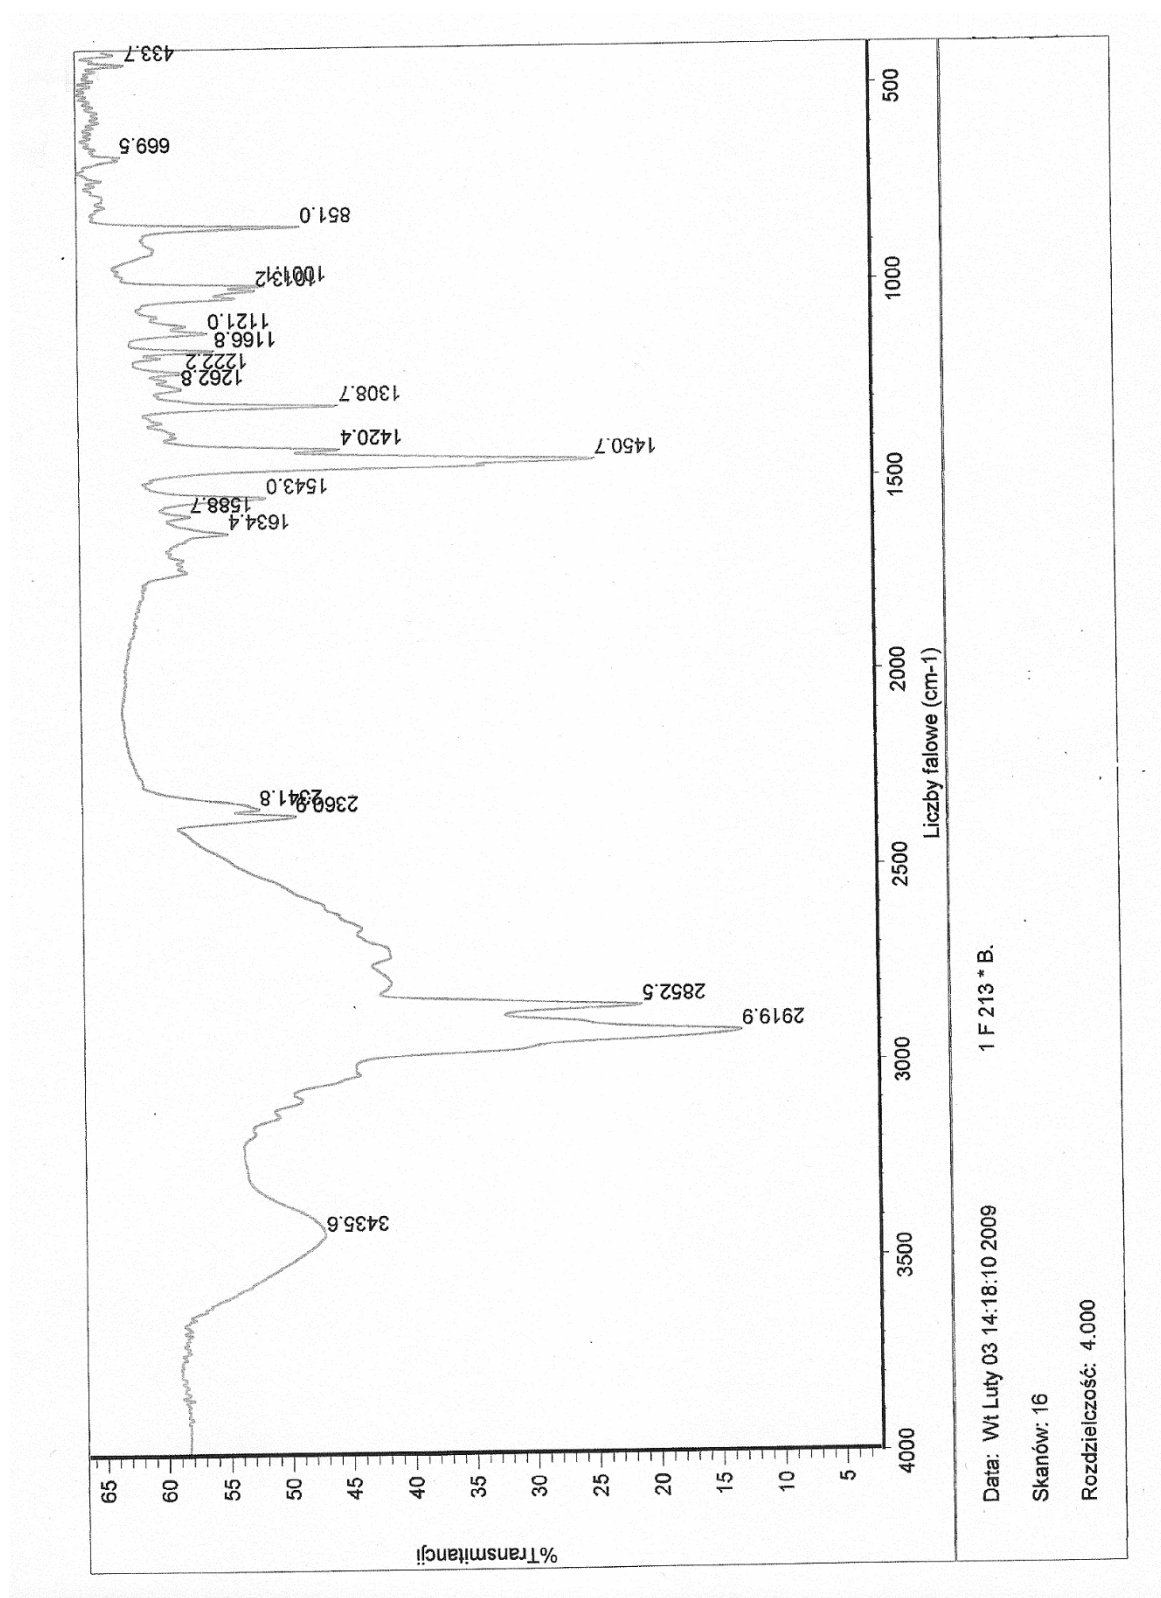

Figure S1. IR spectrum of EJMCh-6.

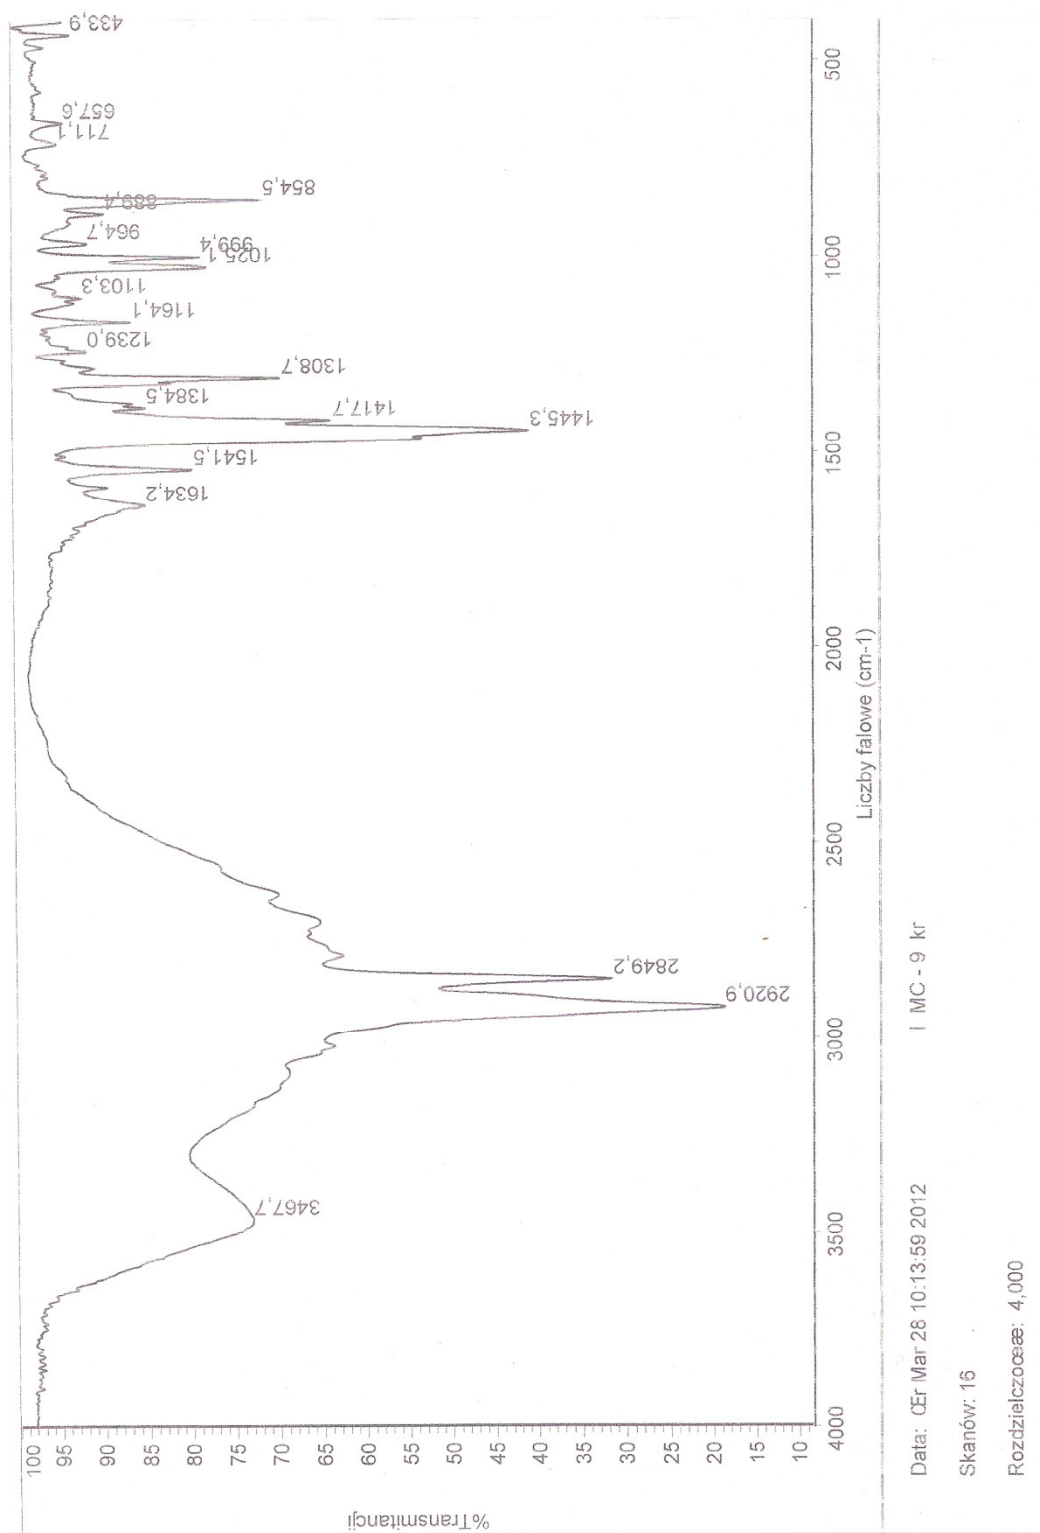

**Figure S2.** IR spectrum of EJMCh-9.

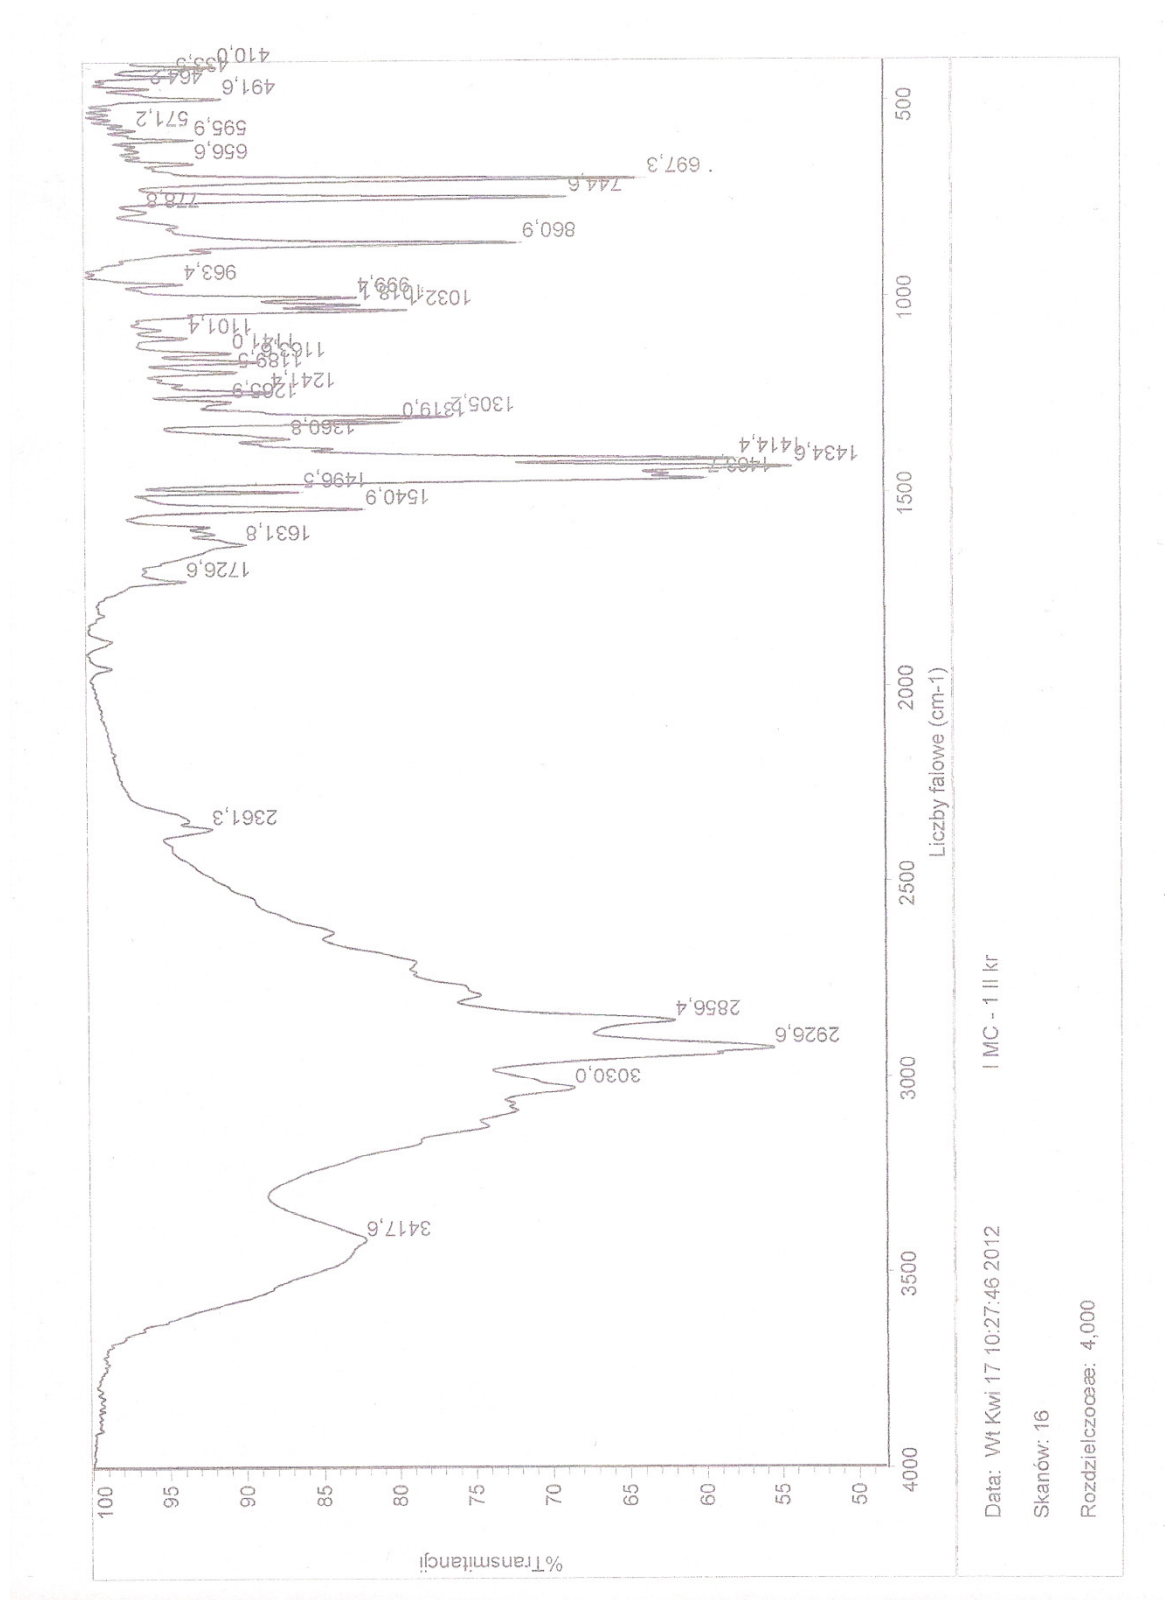

Figure S3. IR spectrum of EJMCh-13.

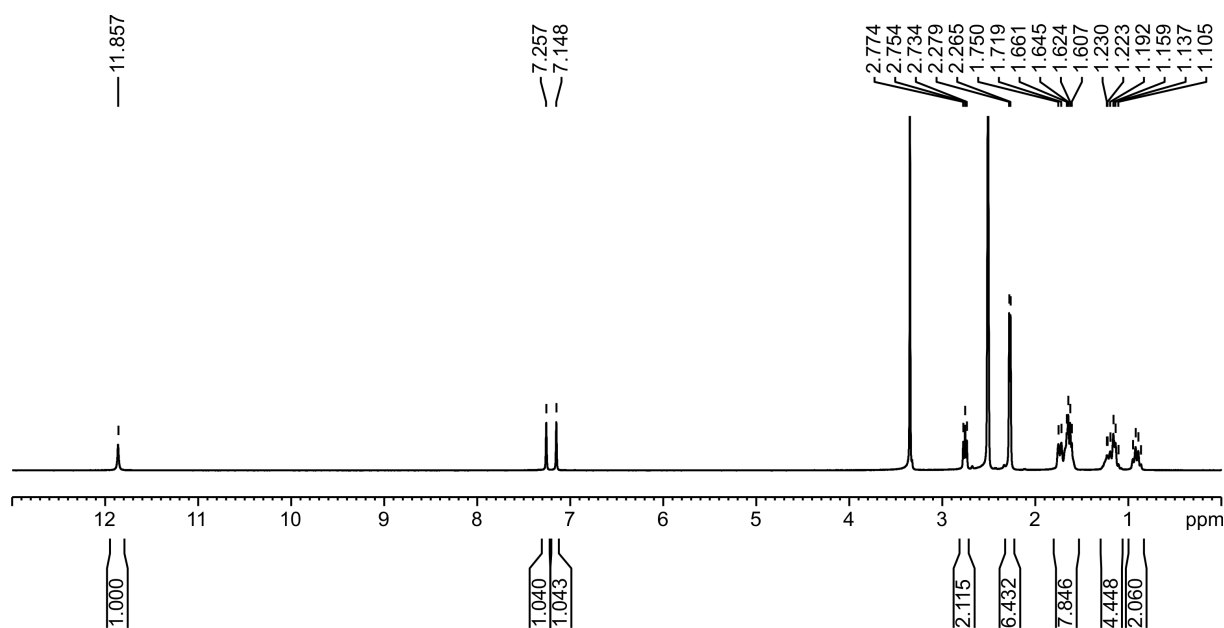

Figure S4. Solution-state <sup>1</sup>H NMR (DMSO-d<sub>6</sub>) of EJMCh-6.

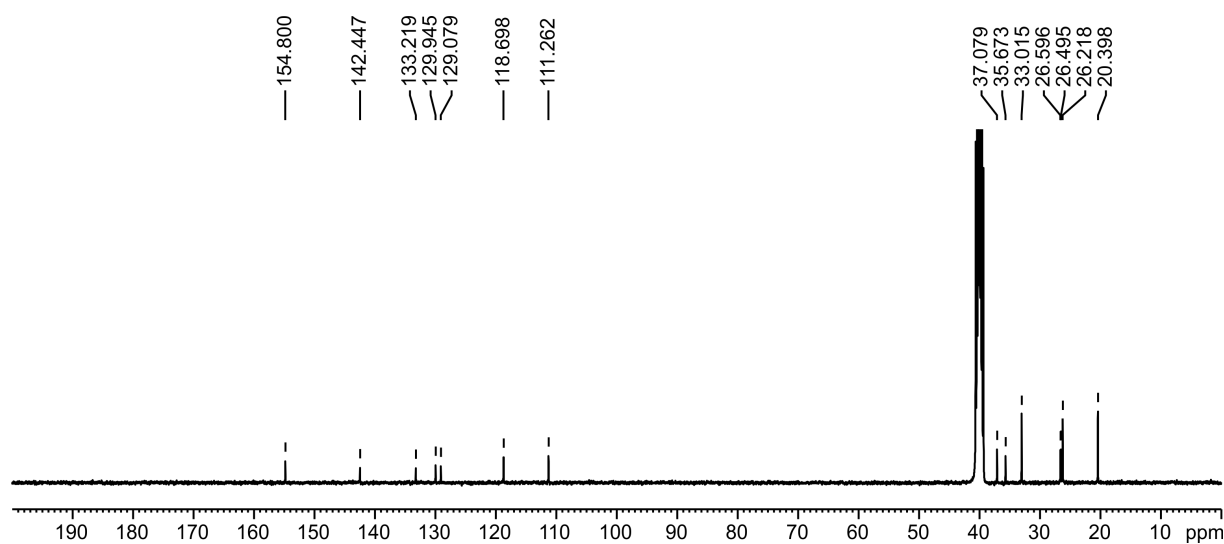

Figure S5. Solution-state <sup>13</sup>C NMR (DMSO-d<sub>6</sub>) of EJMCh-6.

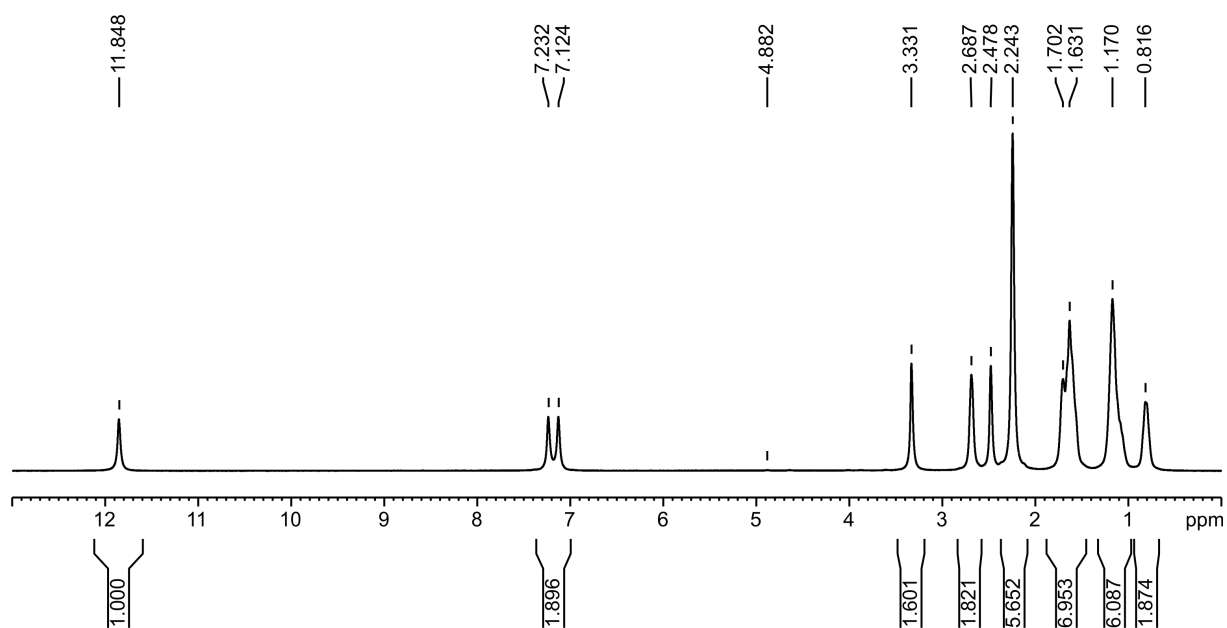

Figure S6. Solution-state <sup>1</sup>H NMR (DMSO-d<sub>6</sub>) of EJMCh-9.

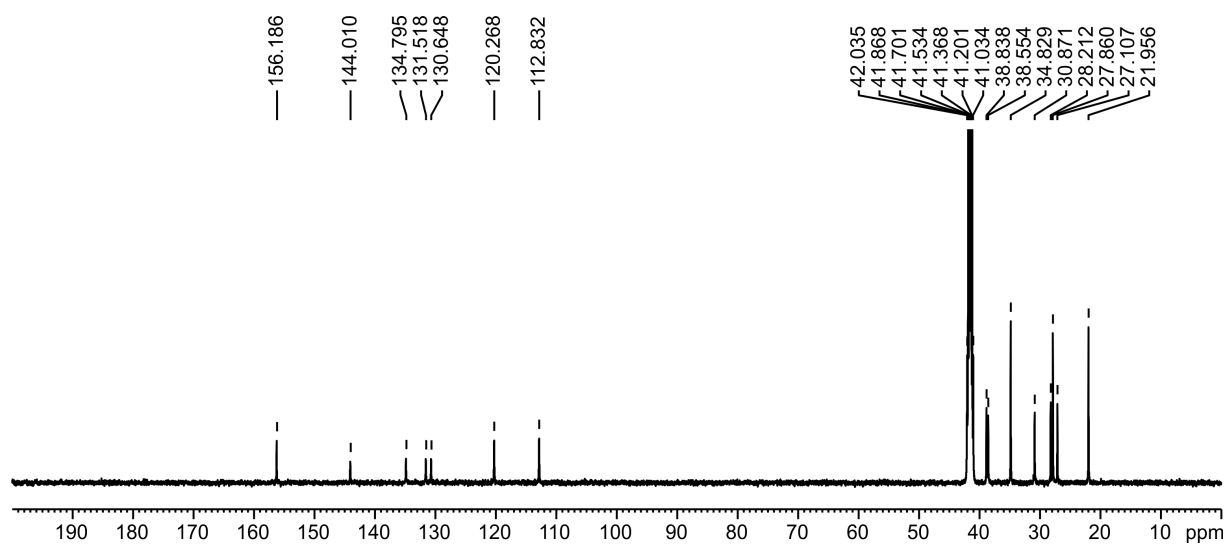

Figure S7. Solution-state <sup>13</sup>C NMR (DMSO-d<sub>6</sub>) of EJMCh-9.

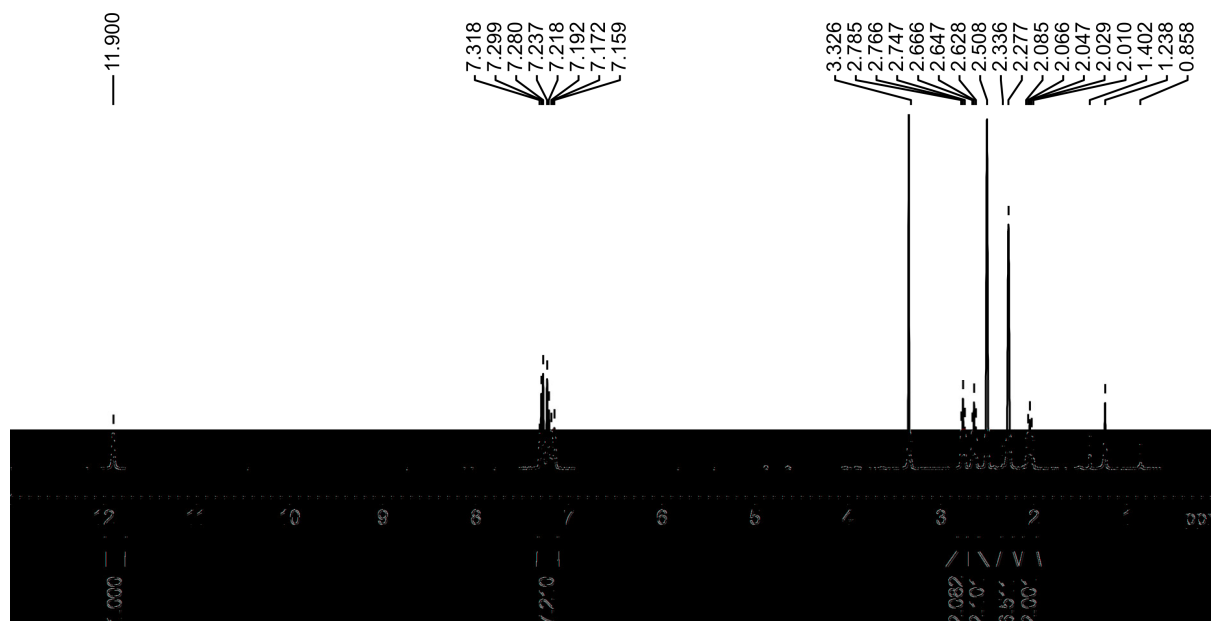Figure S8. Solution-state  $^1\text{H}$  NMR ( $\text{DMSO-d}_6$ ) of EJMCh-13.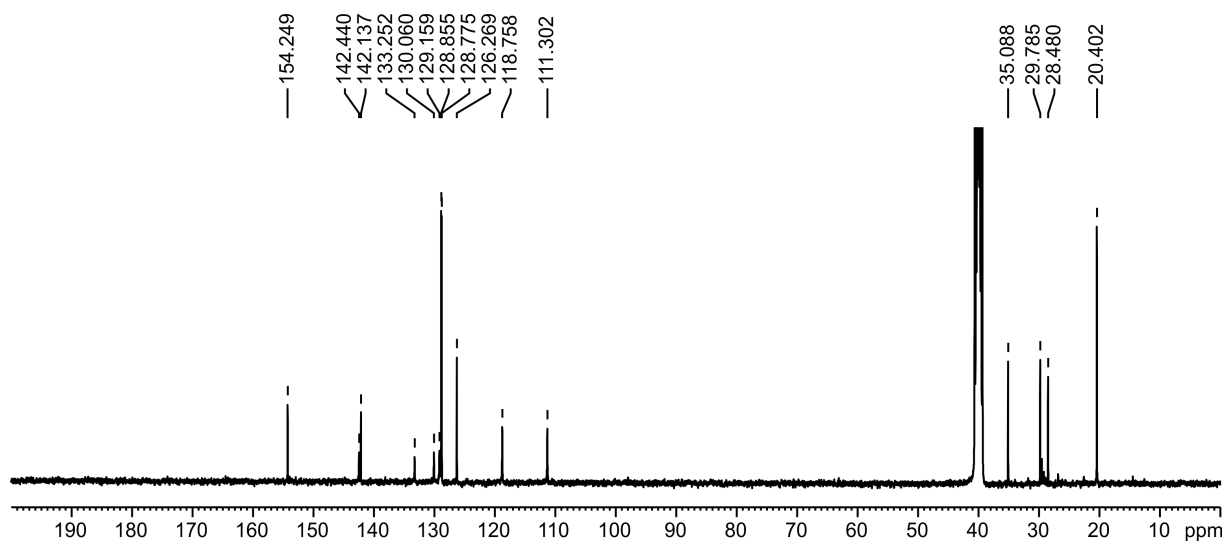Figure S9. Solution-state  $^{13}\text{C}$  NMR ( $\text{DMSO-d}_6$ ) of EJMCh-13.
